# Supplementary material
Source: PubMed Central journal article supplement (PMC2547145)
Supplement: NIHMS64862-supplement-1_s.pdf [file NIHMS64862-supplement-1_s.pdf]

## **SUPPLEMENTARY DATA**

### **Fig. 1. Sequence alignment of the human and mouse hyaluronidases Hyal-1-Hyal-4, PH-20, and Phyal1**

The conserved identical amino acid residues are shaded as by black color whereas homologous residues by grey. The human Hyal sequences are designated as \*\_h and mouse ones by \*\_m. The clear homology of all proteins is evident.
